# Supplementary material for: Metal-free nitrogen-doped hollow carbon spheres synthesized by thermal treatment of poly(o-phenylenediamine) for oxygen reduction reaction in direct methanol fuel cell applications
Source: Royal Society of Chemistry journal article supplement (doi:10.1039/c2jm30781b), 2012-01-01
Supplement: c2jm30781b.pdf [file c2jm30781b.pdf]

## Supporting Information

### Metal-free nitrogen-doped hollow carbon spheres synthesized by thermal treatment of poly(*o*-phenylenediamine) for oxygen reduction reaction in direct methanol fuel cell applications

Ying Li,<sup>\*a,b</sup> Tingting Li<sup>a</sup>, Meng Yao<sup>a</sup>, Songqin Liu<sup>\*a</sup>

<sup>a</sup> School of Chemistry and Chemical Engineering, Southeast University, Nanjing 210096, China.

<sup>b</sup> Key Laboratory of Environmental Medicine Engineering of Ministry of Education, Southeast University, Nanjing 210096, China

#### Materials

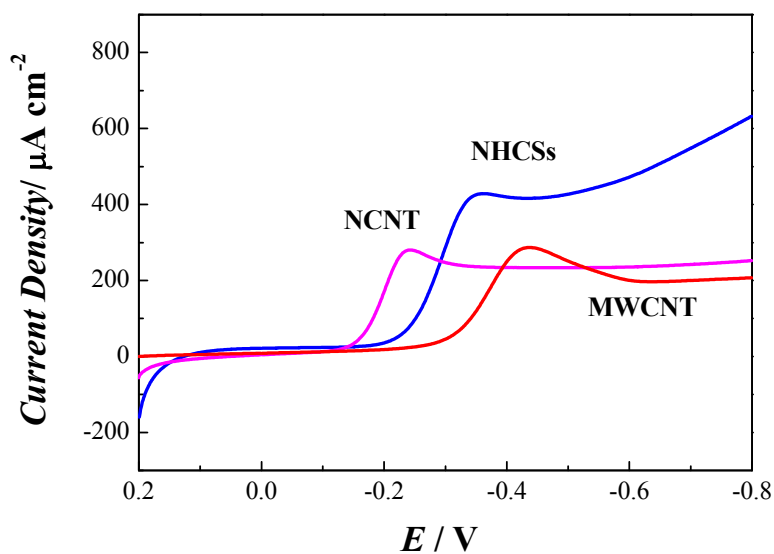

**Fig. S1** LSV measurements for NCNT, MWCNT and NHCSs performed in 0.1 M KOH at a scan rate of 100 mV s<sup>-1</sup>.

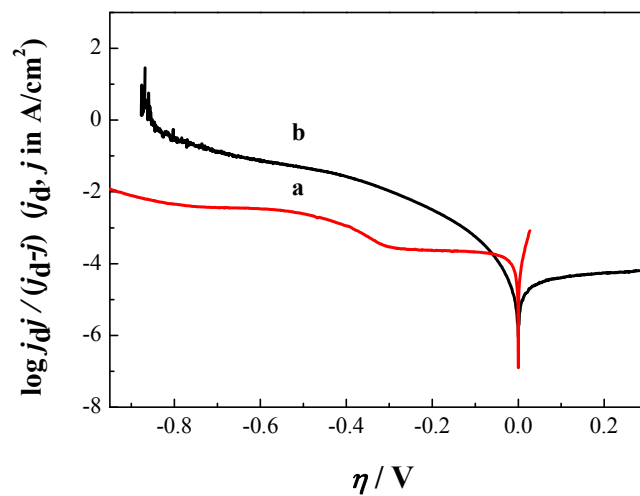

**Fig. S2** Tafel curves of MWCNTs (a) and NHCSs (b) extracted from the polarization curves in Fig. S2.

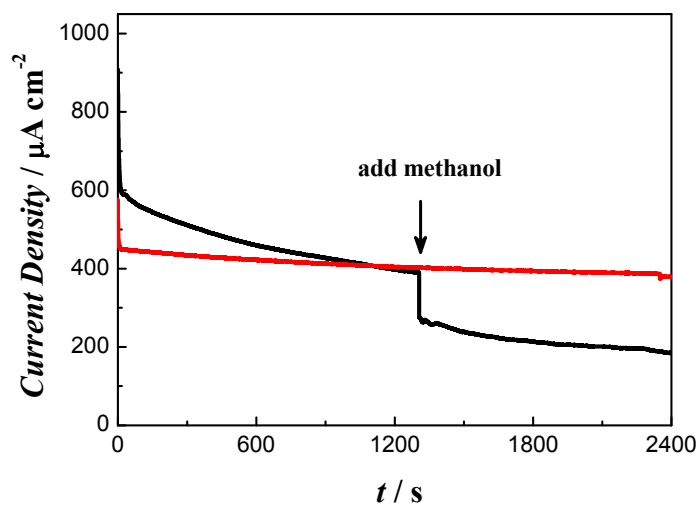

**Fig. S3** Chronoamperometric responses for NHCSs and Pt catalysts in the  $\text{O}_2$ -saturated 0.1 M KOH solution before and after 3.0 M methanol was added.
